# Supplementary material for: Saving endangered species using adaptive management
Source: PubMed Central journal article supplement — Proc Natl Acad Sci U S A. 2019 Mar 11;116(13):6181–6. doi: 10.1073/pnas.1816923116 (PMC6442567; doi:10.1073/pnas.1816923116), 2019-03-11
Supplement: pnas.1816923116.sapp.pdf [file pnas.1816923116.sapp.pdf]

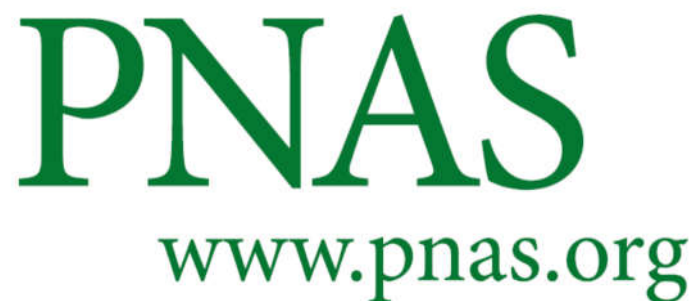

## Supplementary Materials for

### Saving endangered species using adaptive management

R. Serrouya, D.R. Seip, D. Hervieux, B.N. McLellan, R.S. McNay, R. Steenweg, D.C. Heard, M. Hebblewhite, M. Gillingham, S. Boutin.

Correspondence to: [serrouya@ualberta.ca](mailto:serrouya@ualberta.ca)

#### **This PDF file includes:**

Fig. S1

Tables S1 to S3

Supplementary Text

References

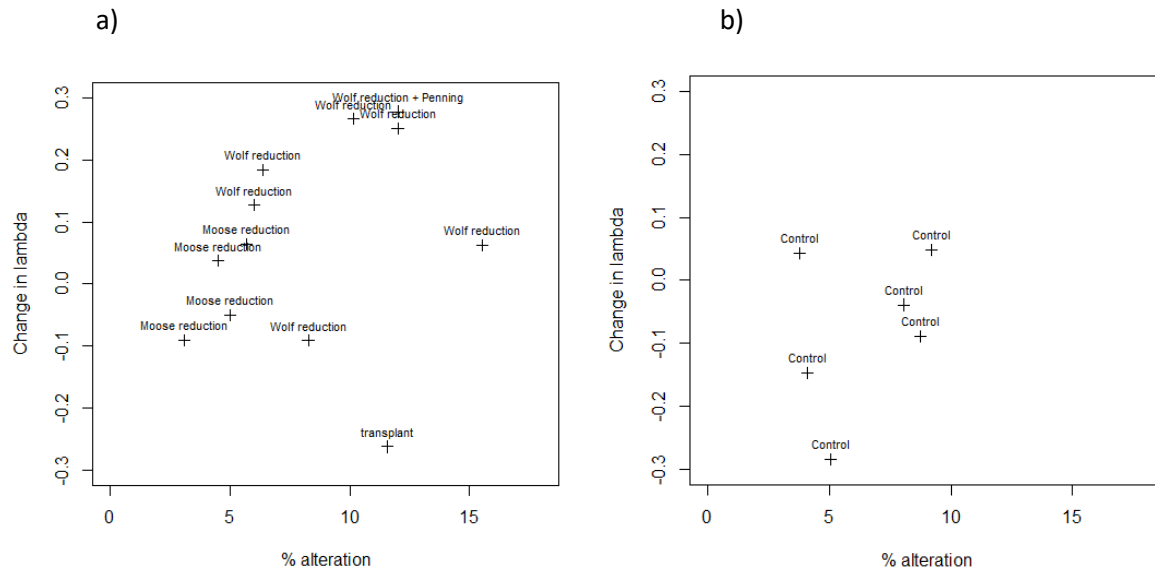

**Fig. S1.** The change in the caribou population growth rate (change in lambda;  $\Delta\lambda$ ) as a result of the % of the woodland caribou range that was altered by early seral vegetation, a measure of habitat loss for caribou. An analysis of covariance accounting for this % habitat loss (logit link) on log transformed  $\lambda$  (i.e.,  $r$ , instantaneous rate of increase) tested for the effects of treatment on caribou population trends. The slope was positive 0.12, with  $p = 0.21$ , and  $r^2 = 0.039$ . In contrast, the effect of treatments was significant, and  $r^2 = 0.44$  (Table 1). The figure is divided into (a) treatment and (b) control populations to simplify visual interpretation.

**Table S1.** Population estimates, population growth rates ( $\lambda$ ), and time spans of  $\lambda$  estimates for each caribou population. Also shown are treatment intensities, amount of disturbance by range (early seral vegetation), amount of forest loss and gain, leading forest type, and mean annual precipitation. For moose reductions, intensity refers to the percentage that the moose population was reduced from its peak, and for wolves, intensity refers to the mean no. removed/year/1000 km<sup>2</sup>.

| Study area | Abbreviation         | Population            | Eco-type <sup>a</sup> | Range area (km <sup>2</sup> ) | Treatment       | Percent disturbed | Dominant forest type <sup>b</sup> | 2 <sup>nd</sup> forest type <sup>b</sup> | Forest loss <sup>c</sup> (%) | Forest gain <sup>c</sup> (%) | Treatment intensity <sup>d</sup> | MAP <sup>e</sup> |
|------------|----------------------|-----------------------|-----------------------|-------------------------------|-----------------|-------------------|-----------------------------------|------------------------------------------|------------------------------|------------------------------|----------------------------------|------------------|
| REV        | CON                  | Columbia North        | S                     | 4652.1                        | Moose reduction | 5.7               | ESSF                              | ICH                                      | <b>2.9</b>                   | <b>2.8</b>                   | 83%                              | 1373             |
| REV        | COS                  | Columbia South        | S                     | 1691.4                        | Moose reduction | 3.1               | ESSF                              | ICH                                      | 2.0                          | 1.1                          | 83%                              | 1396             |
| REV        | FBQ                  | Frisby-Boulder        | S                     | 691.7                         | Moose reduction | 4.5               | ESSF                              | ICH                                      | 3.0                          | 1.4                          | 83%                              | 1403             |
| REV        | GRH                  | Groundhog             | S                     | 1006.0                        | Control         | 9.2               | ESSF                              | ICH                                      | <b>2.5</b>                   | <b>6.5</b>                   | n/a                              | 1364             |
| REV        | WGS                  | Wells Gray South      | S                     | 3550.0                        | Control         | 3.8               | ESSF                              | ICH                                      | <b>1.3</b>                   | <b>2.4</b>                   | n/a                              | 1397             |
| SSE        | SSE                  | South Selkirks        | S                     | 3887.8                        | Wolf reduction  | 8.3               | ESSF                              | ICH                                      | 5.1                          | 3.0                          | 2.1                              | 1407             |
| PUS        | PUS                  | Purcells South        | S                     | 771.5                         | Translocation   | 11.6              | ESSF                              | ICH                                      | 5.9                          | 5.6                          | n/a                              | 766              |
| PAR        | HAS                  | Hart South            | S                     | 8080.9                        | Control         | 4.1               | ESSF                              | SBS                                      | <b>0.8</b>                   | <b>3.2</b>                   | n/a                              | 1447             |
| PAR        | PAR                  | Parsnip               | S                     | 4279.0                        | Moose reduction | 5.0               | ESSF                              | SBS                                      | <b>1.5</b>                   | <b>3.5</b>                   | 40%                              | 1331             |
| PEACE      | KSI                  | Kennedy Siding        | C                     | 2961.6                        | Wolf reduction  | 6.4               | ESSF                              | SBS                                      | 3.9                          | 2.4                          | 7.2                              | 1446             |
| PEACE      | SCE                  | Scott East            | C                     | 2215.0                        | Wolf reduction  | 6.3               | ESSF                              | SBS                                      | 4.0                          | 2.5                          | 7.2                              | 1188             |
| PEACE      | KZA                  | Klinse-za             | C                     | 3291.2                        | Wolf reduction  | 15.8              | ESSF                              | SBS                                      | 11.0                         | 5.1                          | 7.2                              | 1235             |
| PEACE      | KZA/SCE <sup>e</sup> | Klinse-za/ Scott East | C                     | 5506.2                        | Wolf reduction  | 12.0              | ESSF                              | SBS                                      |                              |                              | 7.2                              |                  |
| PEACE      | KZA/SCE <sup>e</sup> | Klinse-za/ Scott East | C                     | 5506.2                        | Wolf reduction  | 12.0              | ESSF                              | SBS                                      |                              |                              | 7.2                              |                  |
| PEACE      | QUI                  | Quintette             | C                     | 6078.1                        | Wolf reduction  | 10.2              | ESSF                              | BWBS                                     | 7.6                          | 2.5                          | 7.2                              | 902              |
| PEACE      | WOL                  | Wolverine             | N                     | 10541.2                       | Control         | 8.7               | ESSF                              | SBS                                      | 5.6                          | 3.0                          | n/a                              | 771              |
| PEACE      | GRA                  | Graham                | N                     | 9290.8                        | Control         | 5.0               | ESSF                              | BWBS                                     | 3.2                          | 1.8                          | n/a                              | 718              |
| AB         | RPC                  | Red Rock/Prairie      | C                     | 4826.2                        | Control         | 8.0               | Subalpine                         | UF                                       | 6.2                          | 1.9                          | n/a                              | 859              |
| AB         | ALP                  | À la Pêche            | C                     | 6614.9                        | Wolf reduction  | 6.0               | Subalpine                         | Alpine                                   |                              |                              | 1.4                              | 901              |
| AB         | ALP                  | À la Pêche            | C                     | 6614.9                        | Wolf reduction  | 6.0               | Subalpine                         | Alpine                                   | 4.7                          | 1.3                          | 6.5                              |                  |
| AB         | LSM                  | Little Smoky          | Boreal                | 3086.1                        | Wolf reduction  | 15.5              | UF                                | LF                                       | 11.4                         | 4.2                          | 9.8                              | 667              |

| Abbreviation          | Population            | Treatment                | BEFORE TREATMENT |          |                        |                      |                            | AFTER TREATMENT |          |                        |                      |                           |
|-----------------------|-----------------------|--------------------------|------------------|----------|------------------------|----------------------|----------------------------|-----------------|----------|------------------------|----------------------|---------------------------|
|                       |                       |                          | Year start       | Year end | Population size: start | Population size: end | $\lambda$ before treatment | Year start      | Year end | Population size: start | Population size: end | $\lambda$ after treatment |
| CON                   | Columbia North        | Moose reduction          | 1994             | 2004     | 206                    | 129                  | 0.95                       | 2004            | 2013     | 129                    | 152                  | 1.02                      |
| COS                   | Columbia South        | Moose reduction          | 1994             | 2004     | 114                    | 40                   | 0.90                       | 2004            | 2013     | 40                     | 6                    | 0.81                      |
| FBQ                   | Frisby                | Moose reduction          | 1994             | 2004     | 36                     | 16                   | 0.92                       | 2004            | 2013     | 16                     | 11                   | 0.96                      |
| GRH                   | Groundhog             | Control                  | 1995             | 2004     | 37                     | 16                   | 0.91                       | 2004            | 2013     | 16                     | 11                   | 0.96                      |
| WGS                   | Wells Gray South      | Control                  | 1995             | 2004     | 286                    | 144                  | 0.93                       | 2004            | 2013     | 144                    | 109                  | 0.97                      |
| SSE                   | South Selkirks        | Wolf reduction           | 2011             | 2014     | 36                     | 14                   | 0.73                       | 2014            | 2018     | 18                     | 3                    | 0.64                      |
| PUS                   | Purcells South        | Translocation            | 1994             | 2012     | 54                     | 20                   | 0.95                       | 2012            | 2018     | 39                     | 4                    | 0.68                      |
| HAS                   | Hart South            | Control                  | 2002             | 2006     | 351                    | 488                  | 1.09                       | 2010            | 2016     | 359                    | 246                  | 0.94                      |
| PAR                   | Parsnip               | Moose reduction          | 2002             | 2007     | 146                    | 148                  | 1.00                       | 2007            | 2016     | 199.5                  | 129                  | 0.95                      |
| KSI                   | Kennedy Siding        | Wolf reduction           | 2007             | 2015     | 120                    | 50                   | 0.90                       | 2015            | 2018     | 50                     | 63                   | 1.08                      |
| SCE                   | Scott East            | Wolf reduction           | 2007             | 2013     | 22                     | 20                   | 0.98                       |                 |          |                        |                      |                           |
| KZA                   | Klinse-za             | Wolf reduction           | 1997             | 2013     | 191                    | 16                   | 0.86                       |                 |          |                        |                      |                           |
| KZA/ SCE <sup>f</sup> | Klinse-za/ Scott East | Wolf reduction           |                  |          |                        |                      | 0.86                       | 2013            | 2014     | 36                     | 40                   | 1.11                      |
| KZA/ SCE <sup>f</sup> | Klinse-za/ Scott East | Wolf reduction + Penning |                  |          |                        |                      | 0.86                       | 2014            | 2018     | 40                     | 67                   | 1.14                      |
| QUI                   | Quintette             | Wolf reduction           | 2008             | 2016     | 173                    | 54                   | 0.86                       | 2016            | 2018     | 54                     | 69                   | 1.13                      |
| WOL                   | Wolverine             | Control                  | 2008             | 2010     | 381                    | 341                  | 0.95                       | 2016            | 2018     | 362                    | 266                  | 0.86                      |
| GRA                   | Graham                | Control                  | 2002             | 2015     | 282                    | 114                  | 0.93                       | 2015            | 2016     | 114                    | 74                   | 0.65                      |
| RPC                   | Red Rock/ Prairie     | Control                  | 2004             | 2006     | n/a                    | n/a                  | 0.87                       | 2007            | 2015     | >50 <sup>g</sup>       |                      | 0.83                      |

|     |              |                |      |      |     |     |      |      |      |                  |      |
|-----|--------------|----------------|------|------|-----|-----|------|------|------|------------------|------|
| ALP | À la Pêche   | Wolf reduction | 2000 | 2006 | n/a | n/a | 0.97 | 2015 | 2017 | >50 <sup>g</sup> | 1.10 |
| ALP | À la Pêche   | Wolf reduction | 2007 | 2014 | n/a | n/a | 0.92 | 2015 | 2017 | >50 <sup>g</sup> | 1.10 |
| LSM | Little Smoky | Wolf reduction | 2000 | 2006 | n/a | n/a | 0.91 | 2007 | 2017 | 110 <sup>h</sup> | 0.97 |

<sup>a</sup> The Southern Mountain population of Woodland Caribou is classified into three distinct groups based on ecological and evolutionary characteristics: southern (S), central (C), and northern (N). All populations in this study are Southern Mountain Woodland Caribou, except the Little Smoky range, which are Boreal Woodland Caribou (Boreal).

<sup>b</sup> ESSF is Engelmann Spruce—Alpine Fir, ICH is Interior Cedar—Hemlock, BWBS is Boreal White and Black Spruce, SBS is Sub-Boreal Spruce, LF is Lower Foothills, and UF is Upper Foothills.

<sup>c</sup> Based on Hansen et al. (2013) (1). ***Bold and italicized*** font indicate where forest gain is similar or greater than forest loss.

<sup>d</sup> Number of wolves removed/yr/km<sup>2</sup>, OR, Percent that moose were reduced from the peak population.

<sup>e</sup> Mean Annual Precipitation (cm) for years 2001–2010.

<sup>f</sup> SCE and KZA caribou merged into a single population as the wolf reduction began.

<sup>g</sup> Based on minimum individuals observed during March recruitment surveys.

<sup>h</sup> 110 Based on DNA mark recapture in 2015.

**Table S2.** Analysis of covariance based on the null hypothesis that only habitat alteration explained the change in population growth rate ( $\Delta\lambda$ ) (Fig. S1). The multiple  $R^2$  is 0.095 and the adjusted  $R^2$  is 0.039. Analysis was performed on  $r$ , where  $r = \ln(\lambda)$ .

---

|                    | Estimate | SE    | t- value | P-value |
|--------------------|----------|-------|----------|---------|
| Intercept          | -0.30    | 0.23  | 1.30     | 0.21    |
| Habitat Alteration | 0.11     | 0.088 | 1.30     | 0.21    |

---

**Table S3.** Analysis of covariance explaining the change in population growth rate ( $\Delta\lambda$ ) based on recovery treatments for woodland caribou. Intercept represents the control populations. The multiple  $R^2$  is 0.60 and the adjusted  $R^2$  is 0.42. Analysis was performed on the change in  $r$ , where  $r = \ln(\lambda)$ . The  $\Delta AICc$  relative to the top model (i.e., Table 1) is 4.68.

|                          | Estimate | SE    | t- value | P-value |
|--------------------------|----------|-------|----------|---------|
| Intercept                | 0.106    | 0.096 | 1.102    | 0.292   |
| Treatment level:         |          |       |          |         |
| Moose reduction          | 0.184    | 0.092 | 1.992    | 0.070   |
| Wolf reduction           | 0.312    | 0.168 | 1.856    | 0.088   |
| Wolf reduction & Penning | -0.288   | 0.167 | -1.731   | 0.109   |
| Translocation            | 0.081    | 0.100 | 0.811    | 0.433   |
| Habitat Alteration       | 0.106    | 0.096 | 1.102    | 0.292   |



## **Supplementary Information Text:**

### **The Reliability of Population Growth Rate Estimates**

#### **Populations in Alberta (LSM, ALP, and RPC)**

Annual  $\lambda$  values were based on estimates of adult female survival from telemetry studies and recruitment from aerial surveys in March (details and annual values are presented in (2-4)). The geometric mean of these estimates stratified by treatment and time period (i.e. before and after treatments began) were based on these annual  $\lambda$  estimates and are summarized in Fig. 1 and presented in Table S1. Hervieux et al. (3) reported that  $\lambda$  was significantly higher for the LSM population after the wolf removal treatment, while RPC (control) continued to decline. Here we show that ALP improved once the wolf reduction was expanded from the winter range to both the summer and winter range. Based on minimum counts during March recruitment surveys, the RPC and ALP populations were  $> 50$  throughout the study, and LSM was estimated at 110 in 2015 based on fecal DNA analysis (5).

#### **Populations in British Columbia – The Southern Mountain Ecotype**

For the southern mountain populations (also referred to as the deep-snow ecotype; (6)), sightability was 88.2 % (135 out of 153 collared animals were detected), but when the snowpack was over 300 cm at 1900 m, 93 % (114 out of 123 collared animals were detected) when population surveys are done in late March (7). Only years when snow depth was  $> 300$  cm were used for population estimates. With such high sightability,  $\lambda$  estimates will be robust to uncertainty, particularly since population decline has been so substantial. Based on  $> 25$  years of radio telemetry and population genetics on adult females and males, as well as juveniles, these populations are demographically separated (8). More recent surveys did not have a marked sample because of the previously established relationship between sightability and snow depth, and radio-collaring animals of an endangered species comes with inherent risks, when non-invasive aerial surveys are possible without having to handle animals.

#### ***Columbia North (CON) – Moose reduction***

The CON caribou population estimate in 2013 ( $n=152$ ) was the minimum number observed and was higher than the upper 95% CI of the 2004 estimate of  $n=129$  (95% CI: 129 – 143). Therefore, the conclusion that the population was at least stable ( $\lambda = 1.02$ ) is supported, as described in (9).

#### ***Columbia South (COS) – Moose reduction***

This caribou population was 114 (95% CI:106 – 142) in 1994, 40 in 2004 (3 of 3 collars detected; no CIs due to low number of marked animals) and the 2013 estimate was 6. Clearly a severe decline since 1994.

#### ***Frisby Queest (FBQ) – Moose reduction***

The population was 36 in 1994 (1 of 2 collars observed) and the 2013 estimate was 11. Severe decline, and any uncertainty would not affect conclusions.

***Wells Gray South (WGS) – Control***

The population estimate was 286 in 1995 and 109 in 2013. No CIs are available for the southern portion of Wells Gray (a population that was found to be demographically separate from Wells Gray North; (6, 10), but over time for the entire Wells Gray population, 39 of 41 radio collared animals were detected during surveys.

***Groundhog (GHG) – Control***

A small population that has continued a trajectory of gradual decline (8, 9).

***Hart South (HAS) – Control***

Population trend was consistent with results of multiple intervening surveys all with high sightability (11).

***Parsnip (PAR) – Moose reduction***

Population trend was consistent with results of multiple intervening surveys all with high sightability (11).

***South Selkirks (SSE) and Purcells South (PUS) – Wolf reduction and translocation***

SSE was counted at 3 animals in March 2018, following a long period of gradual decline (8) – no other tracks were found after extensive searching. All 3 animals were captured and radio-collared following the survey and pregnancy tests revealed that all 3 were barren. The 20-year average for the Southern Mountain ecotype is 92% of adult females are pregnant (8). For PUS, all 20 animals translocated in 2012 were radio-collared and the fates of all animals was known (all died), and 4 animals were counted in 2018 – no other tracks were located after extensive searching.

**Populations in British Columbia – The Central and Northern Mountain Ecotypes**

These populations are within a dryer climate typical of the Rocky Mountains (301 cm mean snowpack in March at 1450 m) meaning that sightability of woodland caribou is not as high as the southern group. Estimates include mark-resight correction factors from collared animals, camera trapping where individuals could be identified, or where animals were handled as part of maternity penning.

***Scott East (SCE) and Klinse-Za (KZA) – Wolf reduction and safe haven (maternal penning)***

This population has been periodically monitored by aerial surveys corrected for sightability since 1994. A high proportion (30-40%, annually since 2014) of these animals have been marked and handled as part of the maternal penning project. Although focused on KZA, maternal penning involved capture of cows from both SCE and KZA to mitigate risk to each population which were both relatively small (N = 20 and 16 in 2013 for SCE and KZA, respectively). Maternal penning of the mixed populations resulted in unpredictable range selection post-release and thereafter the herds merged and population estimates made for the combined herd areas (Table S1). Total population counts were possible due to the small number of animals and having collars placed in each group of caribou prior to surveys. Total count results were checked against sex-specific age-classes predicted using a calculation as follows  $N_t = N_{t-1} + \text{Calves}_t - \text{Mortalities}_{(t-1,t)}$ .

### ***Kennedy Siding (KSI) – Wolf reduction***

1993 estimate (n=97) was the minimum number observed. Estimates from periodic aerial survey counts, corrected for sightability, between 2002 and 2012 were consistent with a long-term decline. In 2014 and 2017 this population was monitored with cameras where all animals congregate on a winter range. Each animal was identified, based on antler characteristics, with most being detected numerous times. All radio-collared individuals were detected with cameras (n = 13). Below is the saturation curve of new animals, showing recent increase (12).

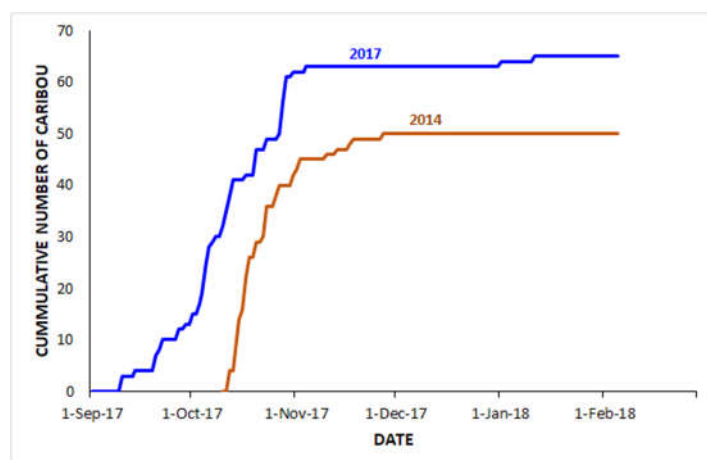

### ***Quintette (QUI) – Wolf reduction***

This population has been periodically monitored by aerial surveys corrected for sightability since 2002. Population estimates used for this analysis are consistent with the long-term trend line (12).

### ***Wolverine (WOL) – Control***

Aerial census and vital rates (survival and recruitment) both show a long-term decline of this control population (7).

### ***Graham (GRA) - Control***

This population has been periodically monitored by aerial surveys corrected for sightability since 1989. Population estimates used for this analysis are consistent with the long-term trend line (12).

### **References:**

1. Hansen MC, *et al.* (2013) High-resolution global maps of 21st-century forest cover change. *Science* 342(6160):850-853.
2. Hervieux D, Hebblewhite M, Stepnisky D, Bacon M, & Boutin S (2014) Managing wolves (*Canis lupus*) to recover threatened woodland caribou (*Rangifer tarandus caribou*) in Alberta. *Canadian Journal of Zoology* 92(12):1029-1037.
3. Hervieux D, *et al.* (2013) Widespread declines in woodland caribou (*Rangifer tarandus caribou*) continue in Alberta. *Canadian Journal of Zoology* 91(12):872-882.

4. Parks AEa (2017) DRAFT Provincial Caribou Range Plan. (Government of Alberta, Edmonton, Alberta.).
5. Canada EaCC (2017) Report on the Progress of Recovery Strategy Implementation for the Woodland Caribou (*Rangifer tarandus caribou*), Boreal population in Canada for the Period 2012-2017. ed Canada EaCC (Ottawa), p 94.
6. Serrouya R, *et al.* (2012) Population size and major valleys explain microsatellite variation better than taxonomic units for caribou in western Canada. *Molecular Ecology* 21:2588–2601.
7. Serrouya R, *et al.* (2017) Comparing population growth rates between census and recruitment-mortality models. *Journal of Wildlife Management* 81(2):297-305.
8. Wittmer HU, *et al.* (2005) Population dynamics of the endangered mountain ecotype of woodland caribou (*Rangifer tarandus caribou*) in British Columbia, Canada. *Canadian Journal of Zoology* 83(3):407-418.
9. Serrouya R, McLellan BN, van Oort H, Mowat G, & Boutin S (2017) Experimental moose reduction lowers wolf density and stops decline of endangered caribou. *PeerJ* 5:e3736.
10. van Oort H, McLellan BN, & Serrouya R (2011) Fragmentation, dispersal and metapopulation function in remnant populations of endangered mountain caribou. *Animal Conservation* 14(3):215-224.
11. Klaczek M & Heard DC (2016) Population Assessment of Southern Mountain Caribou (*Rangifer tarandus*) in the Prince George Forest District. (Ministry of Forests, Lands, and Natural Resource Operations, Prince George, BC).
12. Seip D & Jones E (2018) Population status of Central Mountain caribou herds in British Columbia and response to recovery management actions, 2018. (British Columbia Ministry of Environment, Pringe George, BC).
